# Supplementary material for: Anti-Inflammatory Cycloartane-Type Saponins of Astragalus membranaceus
Source: PubMed Central journal article supplement (PMC6269660; doi:10.3390/molecules18043725), 2013-03-25

# Supplementary Materials

Figure S1.  $^1\text{H-NMR}$  of compound **1**.

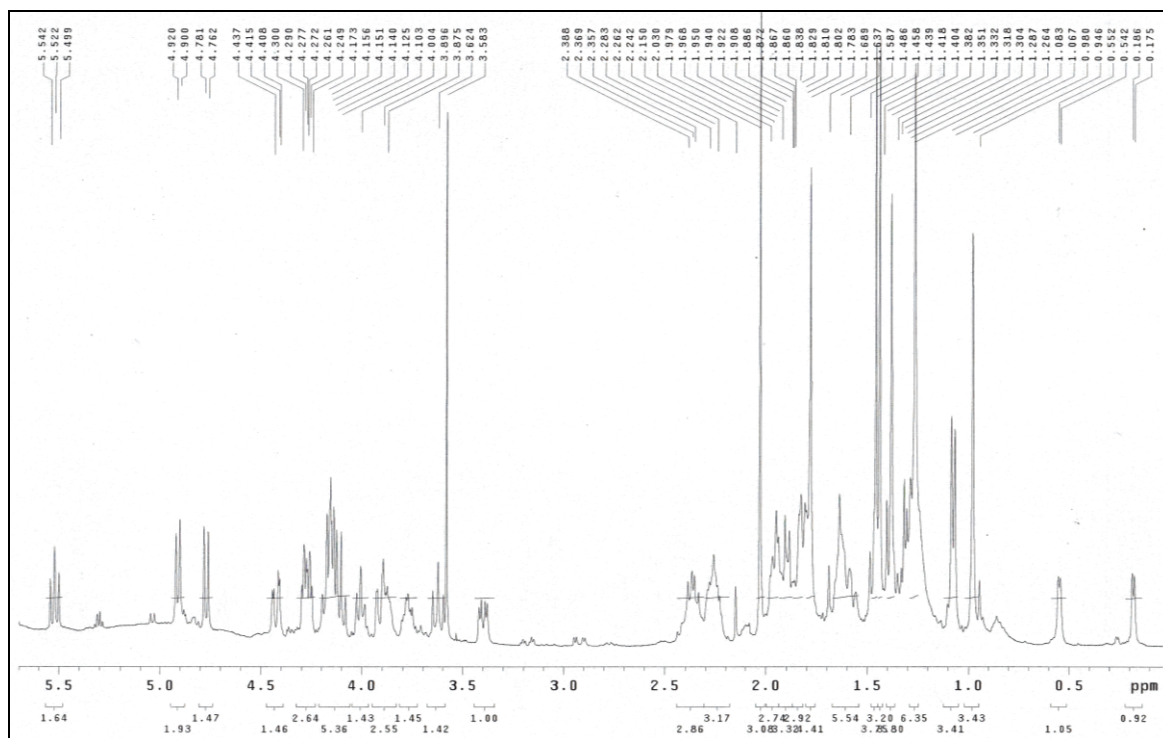

Figure S2.  $^{13}\text{C-NMR}$  of compound **1**.

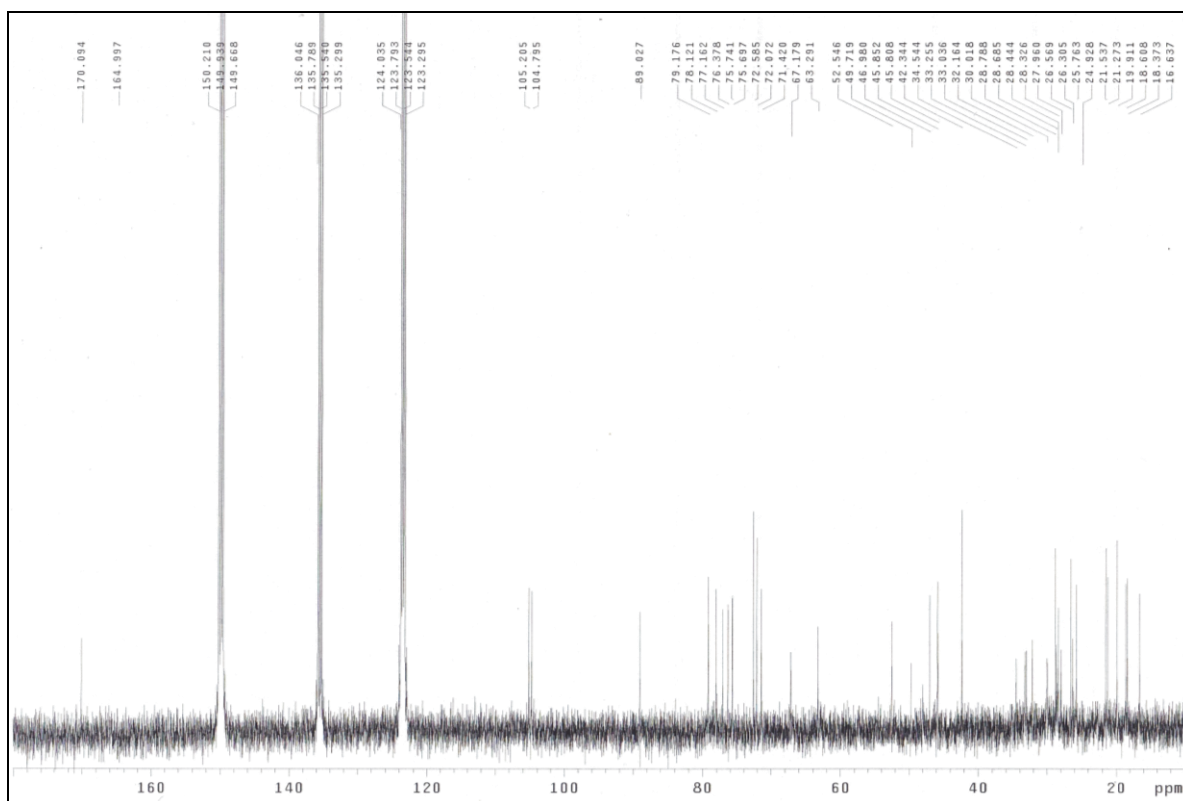

Figure S3. HR-FABMS of compound 1.

[Mass Spectrum]  
Data : 20130315-HR-Agrostragaloside V Date : 15-Mar-2013  
Sample : Agrostragaloside V  
Inlet : Direct Ion Mode : FAB-  
RT : 0.88 min Scan# : 20  
Elements : C 43/0, H 71/0, O 14/0  
MassTolerance : 50mmu  
Unsaturation (U. S.) : -0.5 - 50.0

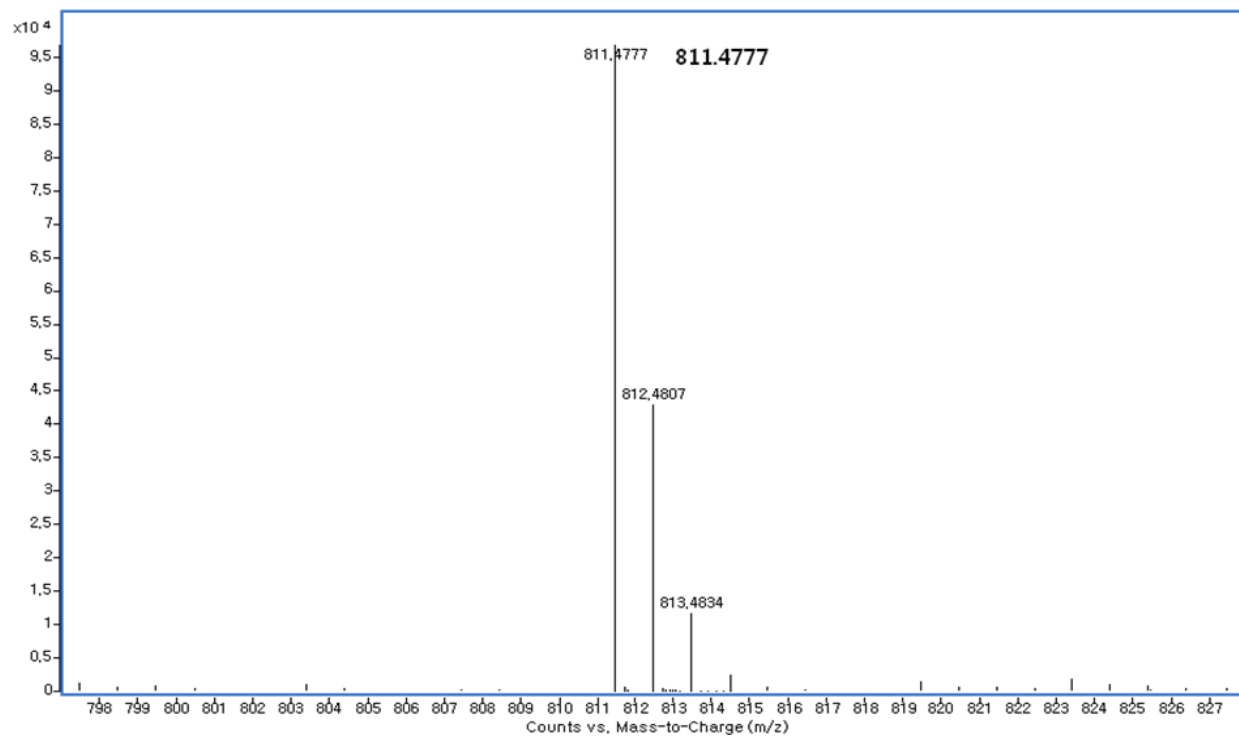

Supplement: molecules-18-03725-s001.pdf [file molecules-18-03725-s001.pdf]
